# Supplementary material for: 9,10-Dihydroanthracenyl structures: original ligands for the synthesis of polymetallic complexes through selective π-coordination
Source: Royal Society of Chemistry journal article supplement (doi:10.1039/c2dt32586a), 2012-11-05
Supplement: c2dt32586a.pdf [file c2dt32586a.pdf]

## SUPPLEMENTARY INFORMATION

### 9,10-dihydroanthracenyl structures: original ligands for the synthesis of polymetallic complexes through selective $\pi$ -coordination

Ielyzaveta Bratko,<sup>a</sup> Sonia Mallet-Ladeira,<sup>b</sup> Nathalie Saffon,<sup>b</sup> Emmanuelle Teuma<sup>a</sup> and Montserrat Gómez<sup>a</sup>

<sup>a</sup> Laboratoire Hétérochimie Fondamentale et Appliquée UMR CNRS 5069, Université Paul Sabatier, 118 route de Narbonne, 31062 Toulouse Cedex 9, France. E-mail: [gomez@chimie.ups-tlse.fr](mailto:gomez@chimie.ups-tlse.fr). Fax: +33 561558204; Tel: +33 561557738.

<sup>b</sup> Université de Toulouse, UPS, Institut de Chimie de Toulouse FR2599, 118 route de Narbonne, 31062 Toulouse cedex 9, France.

#### Figures

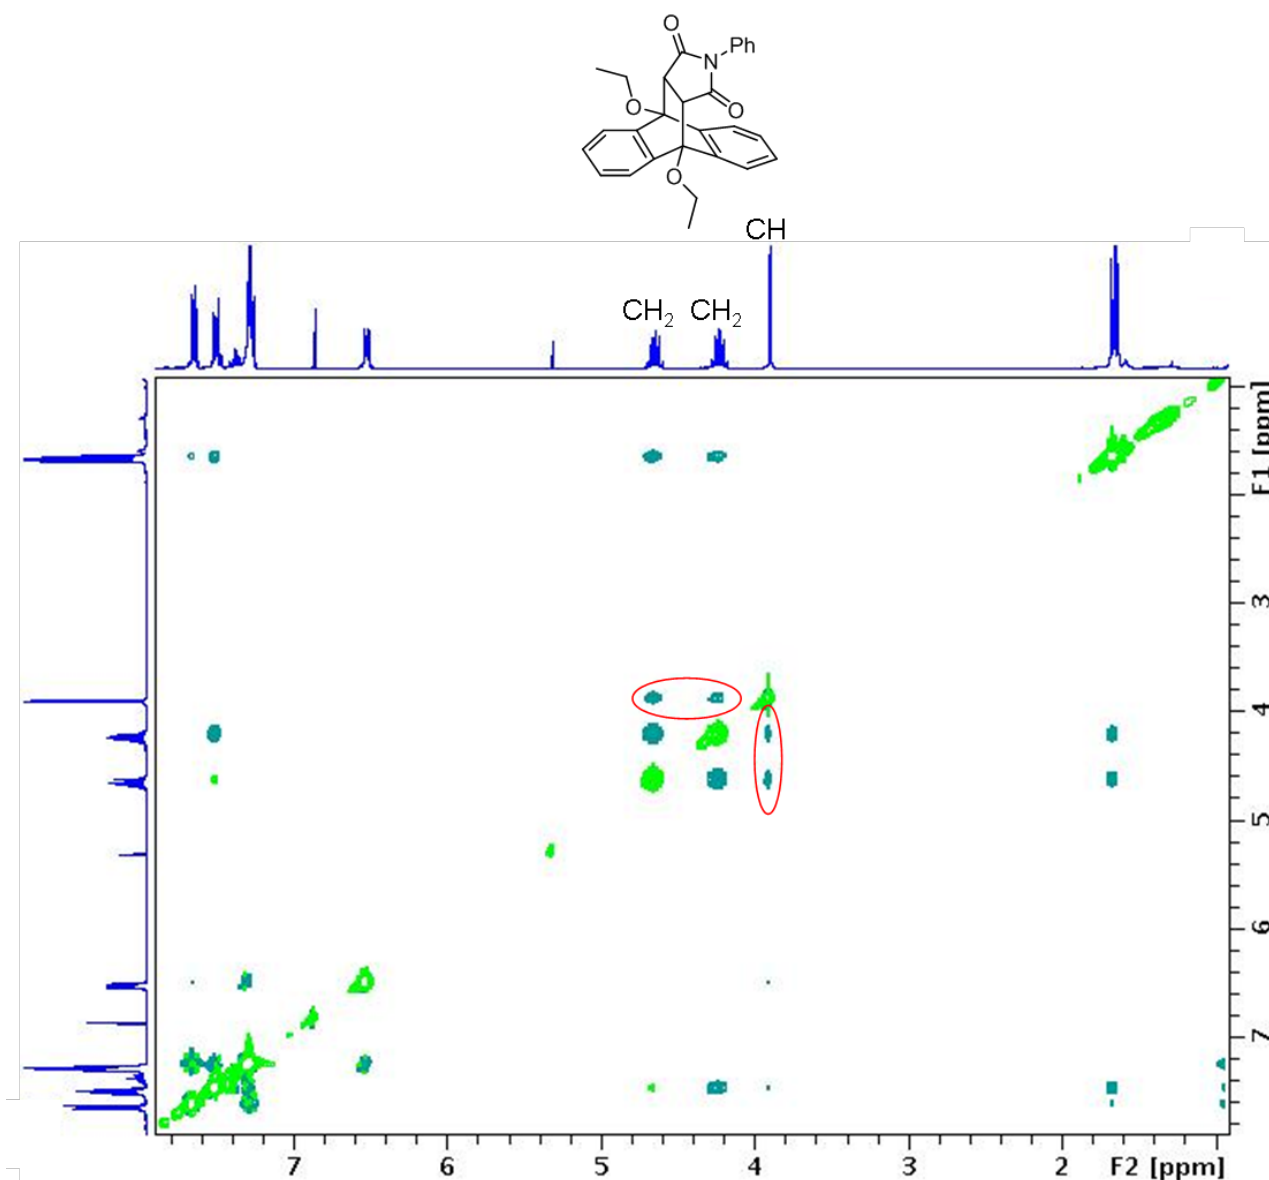

Fig. S1. Selected NOE contacts for ligand B.

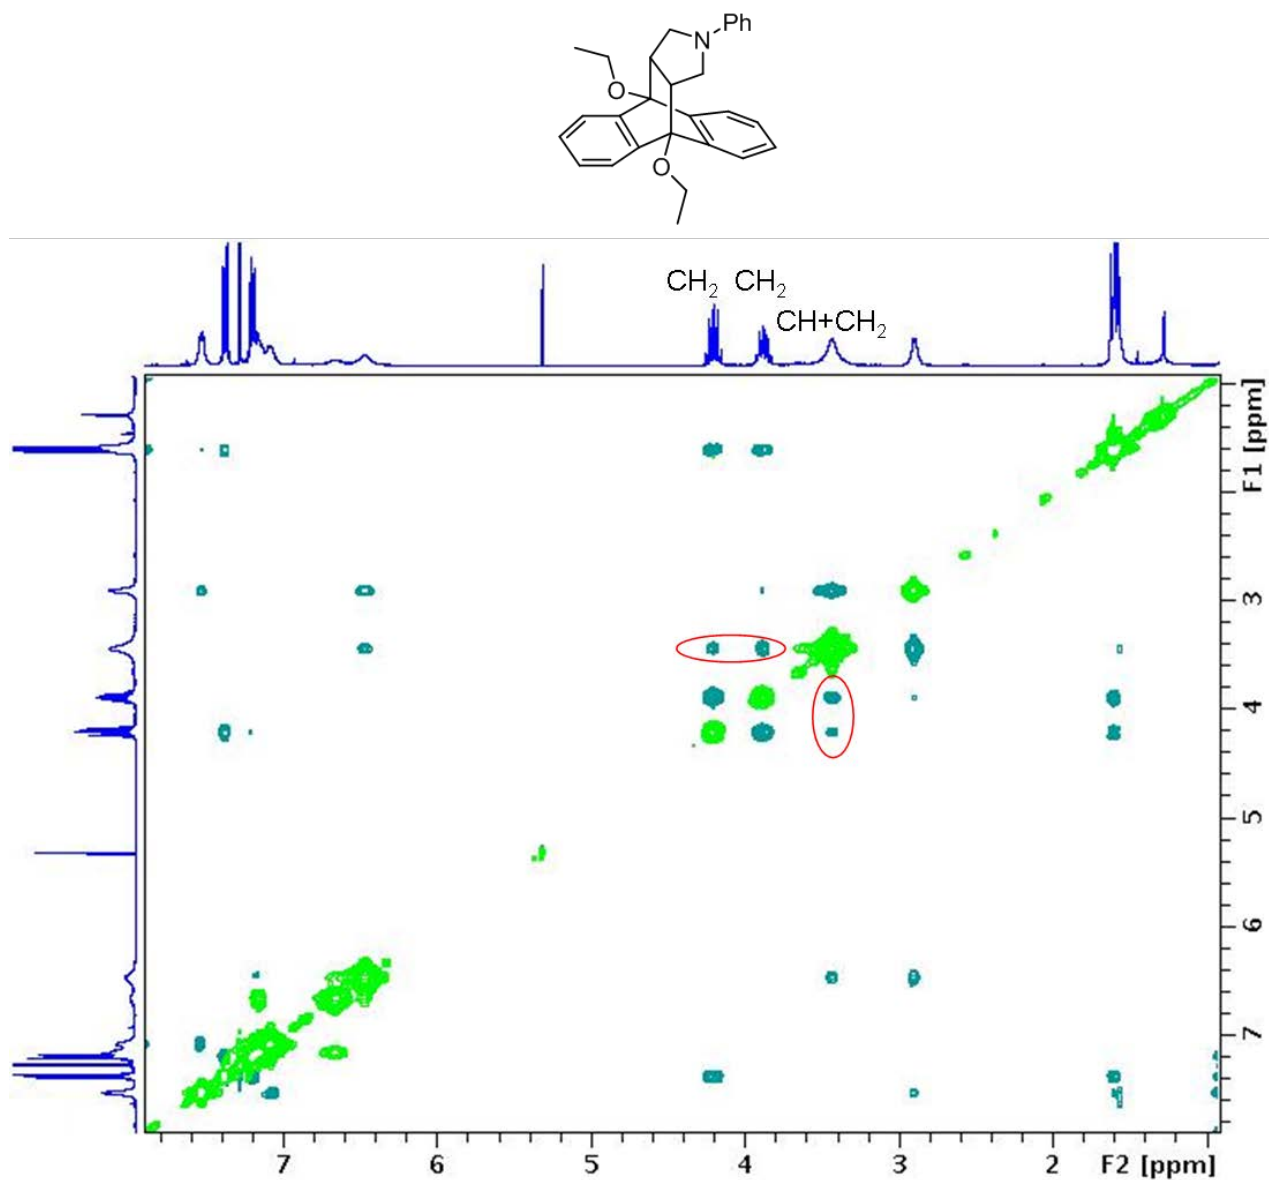

**Fig. S2.** Selected NOE contacts for ligand **D**.

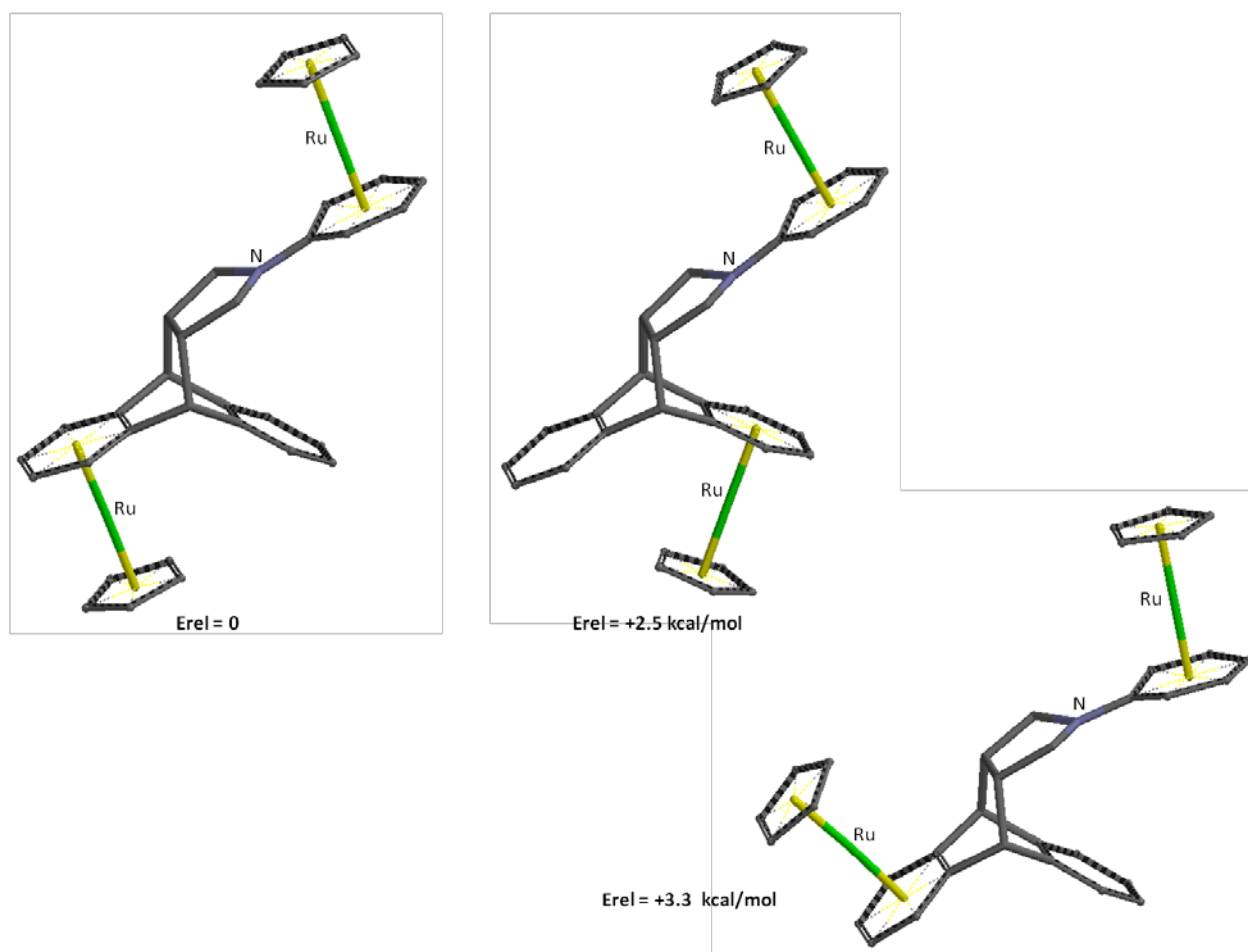

**Fig. S3.** Calculated structures (DFT) for cations  $[\text{RuCp}((\eta^6\text{-arene})_2\text{C})]^{2+}$  showing the coordination through **Ar3** cycle (a), **Ar2** (b) and **Ar1** (c and d). Hydrogen atoms are omitted for clarity.

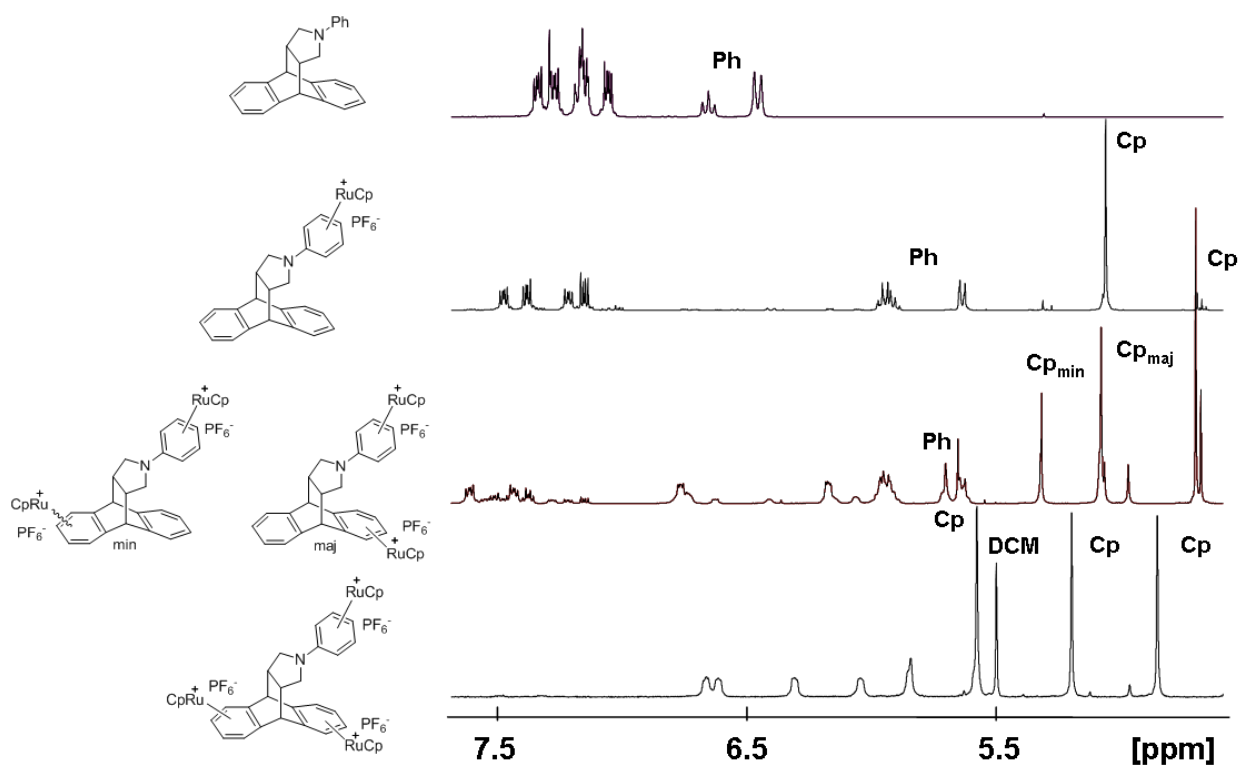

**Fig. S4.**  $^1\text{H}$  NMR (300 MHz,  $(\text{CD}_3)_2\text{CO}$ , 298 K) monitoring of **C** by consecutive addition of  $[\text{RuCp}(\text{CH}_3\text{CN})_3]\text{PF}_6$

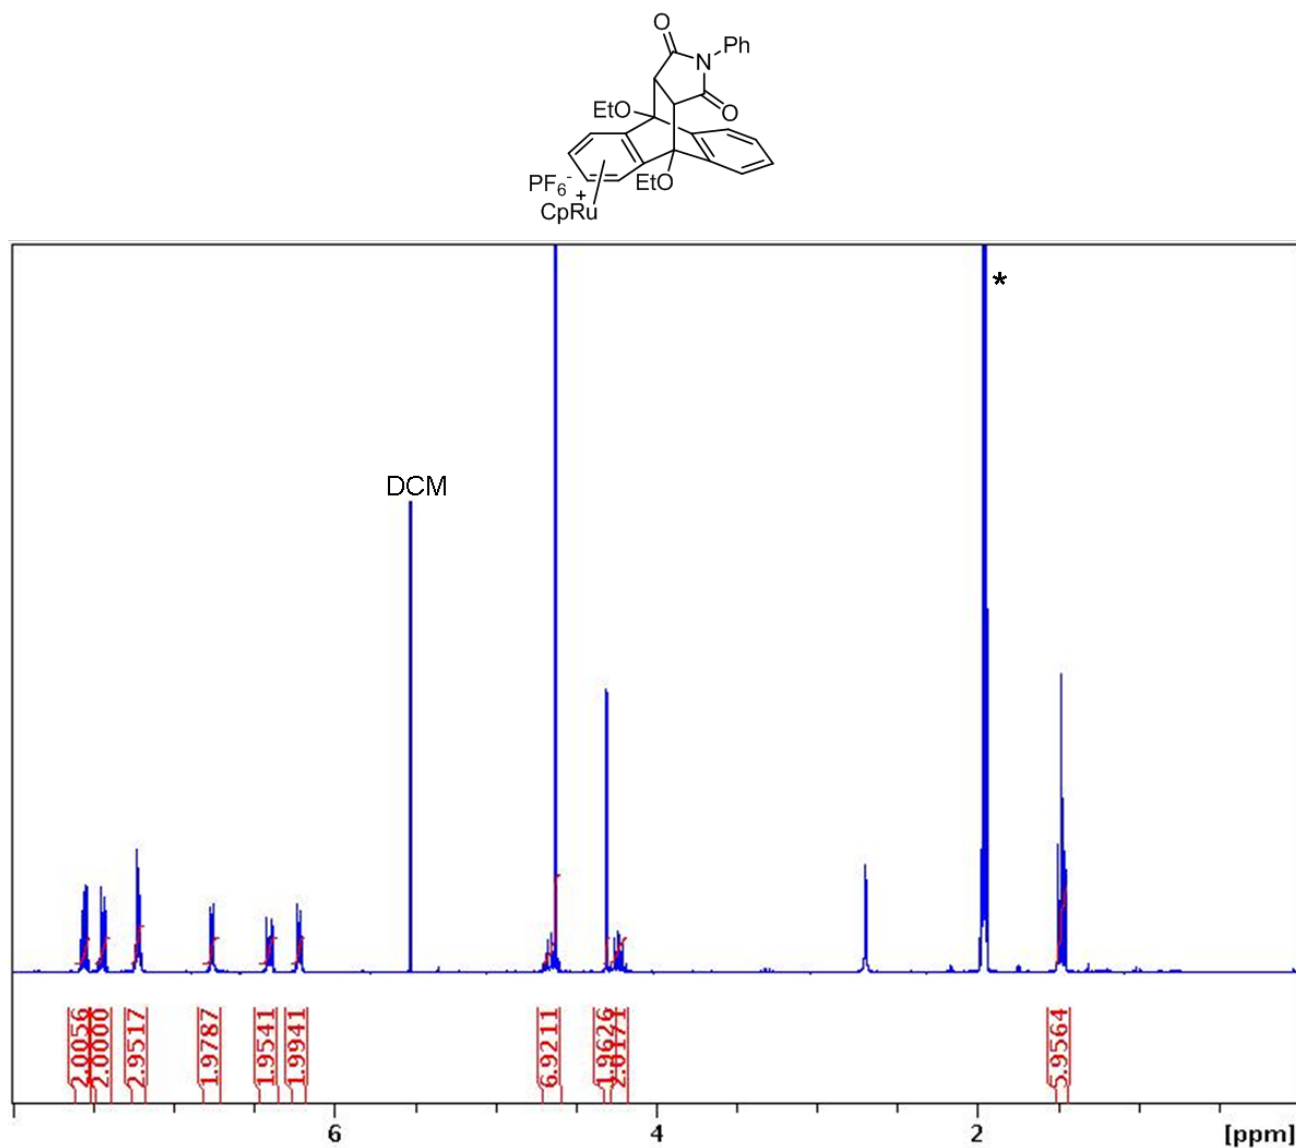

**Fig. S5.**  $^1\text{H}$  NMR (300 MHz,  $(\text{CD}_3)_2\text{CO}$ , 298 K) spectrum for **BRu1**. \* denotes partially protonated solvent.

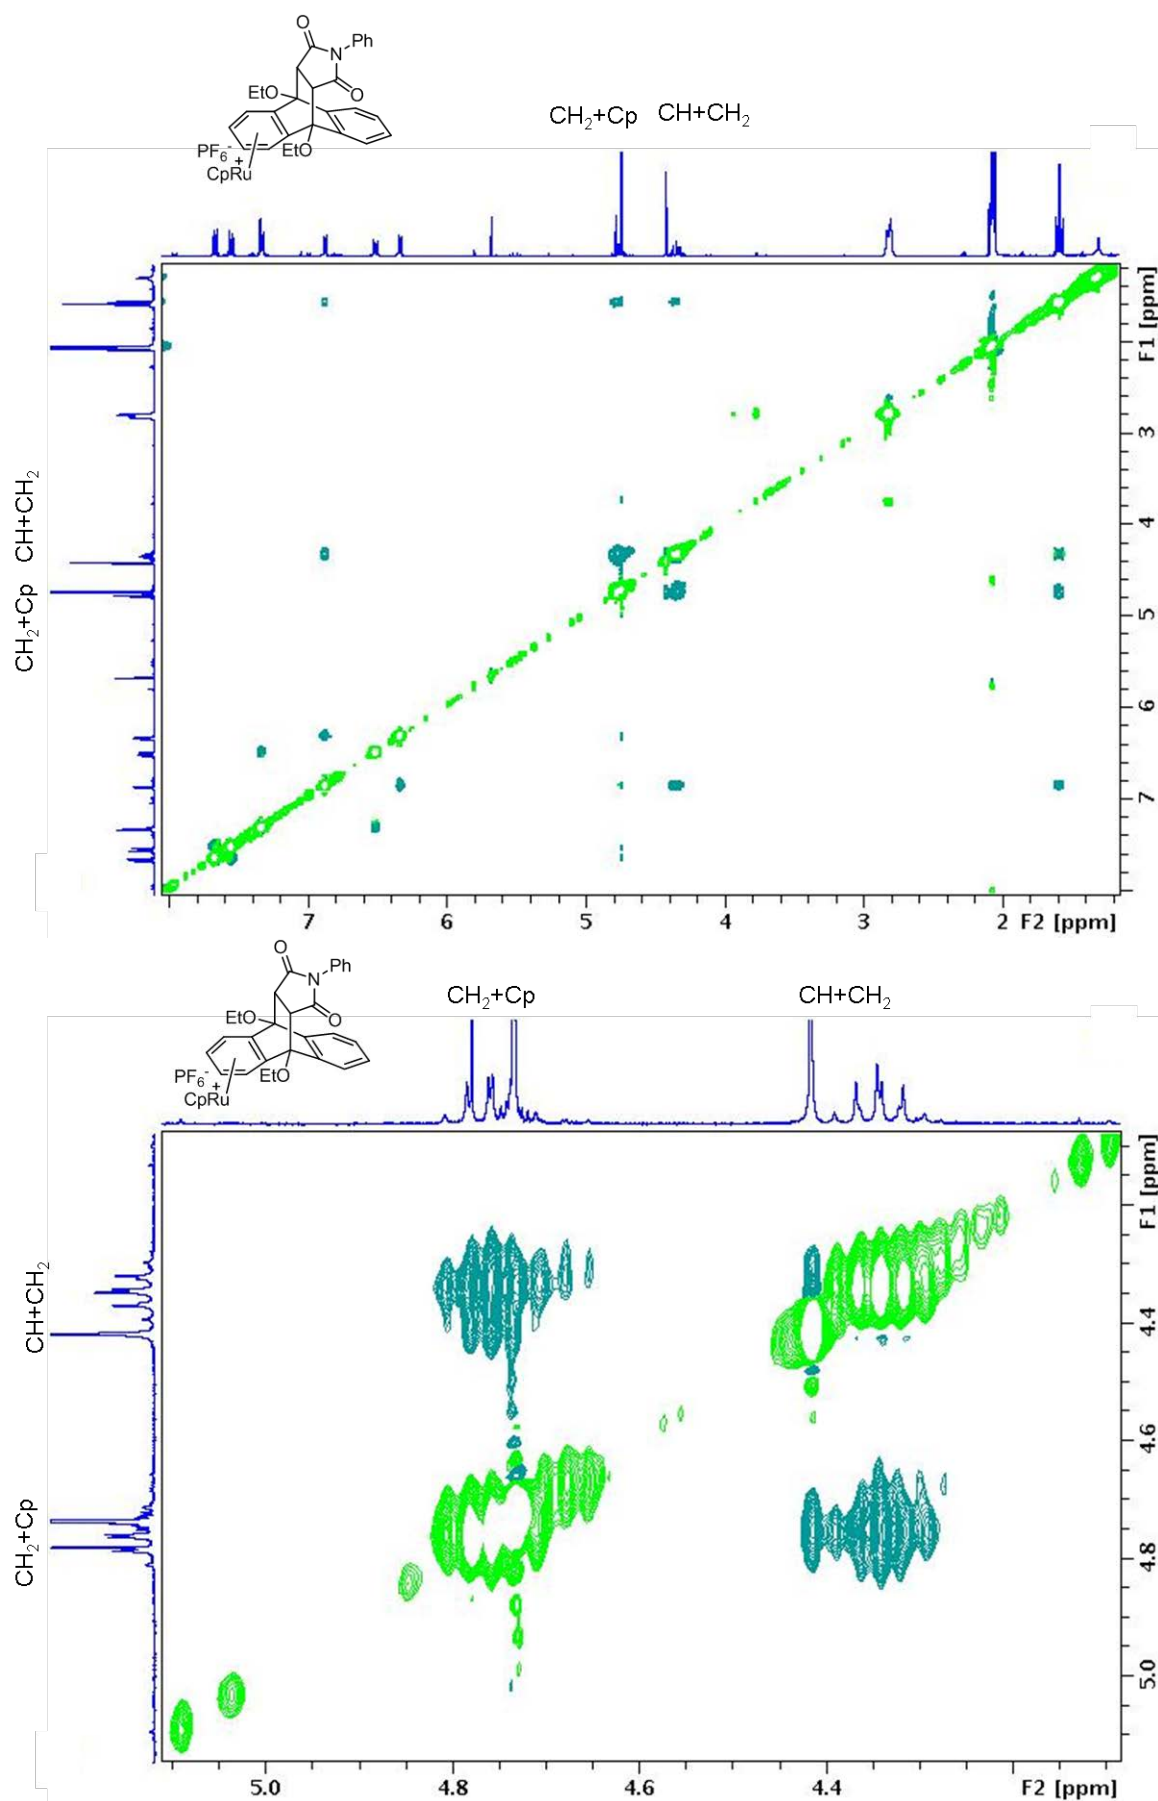

**Fig. S6.** NOESY NMR spectrum (300 MHz,  $(\text{CD}_3)_2\text{CO}$ , 298 K) and selected NOE contacts for **BRu1**.

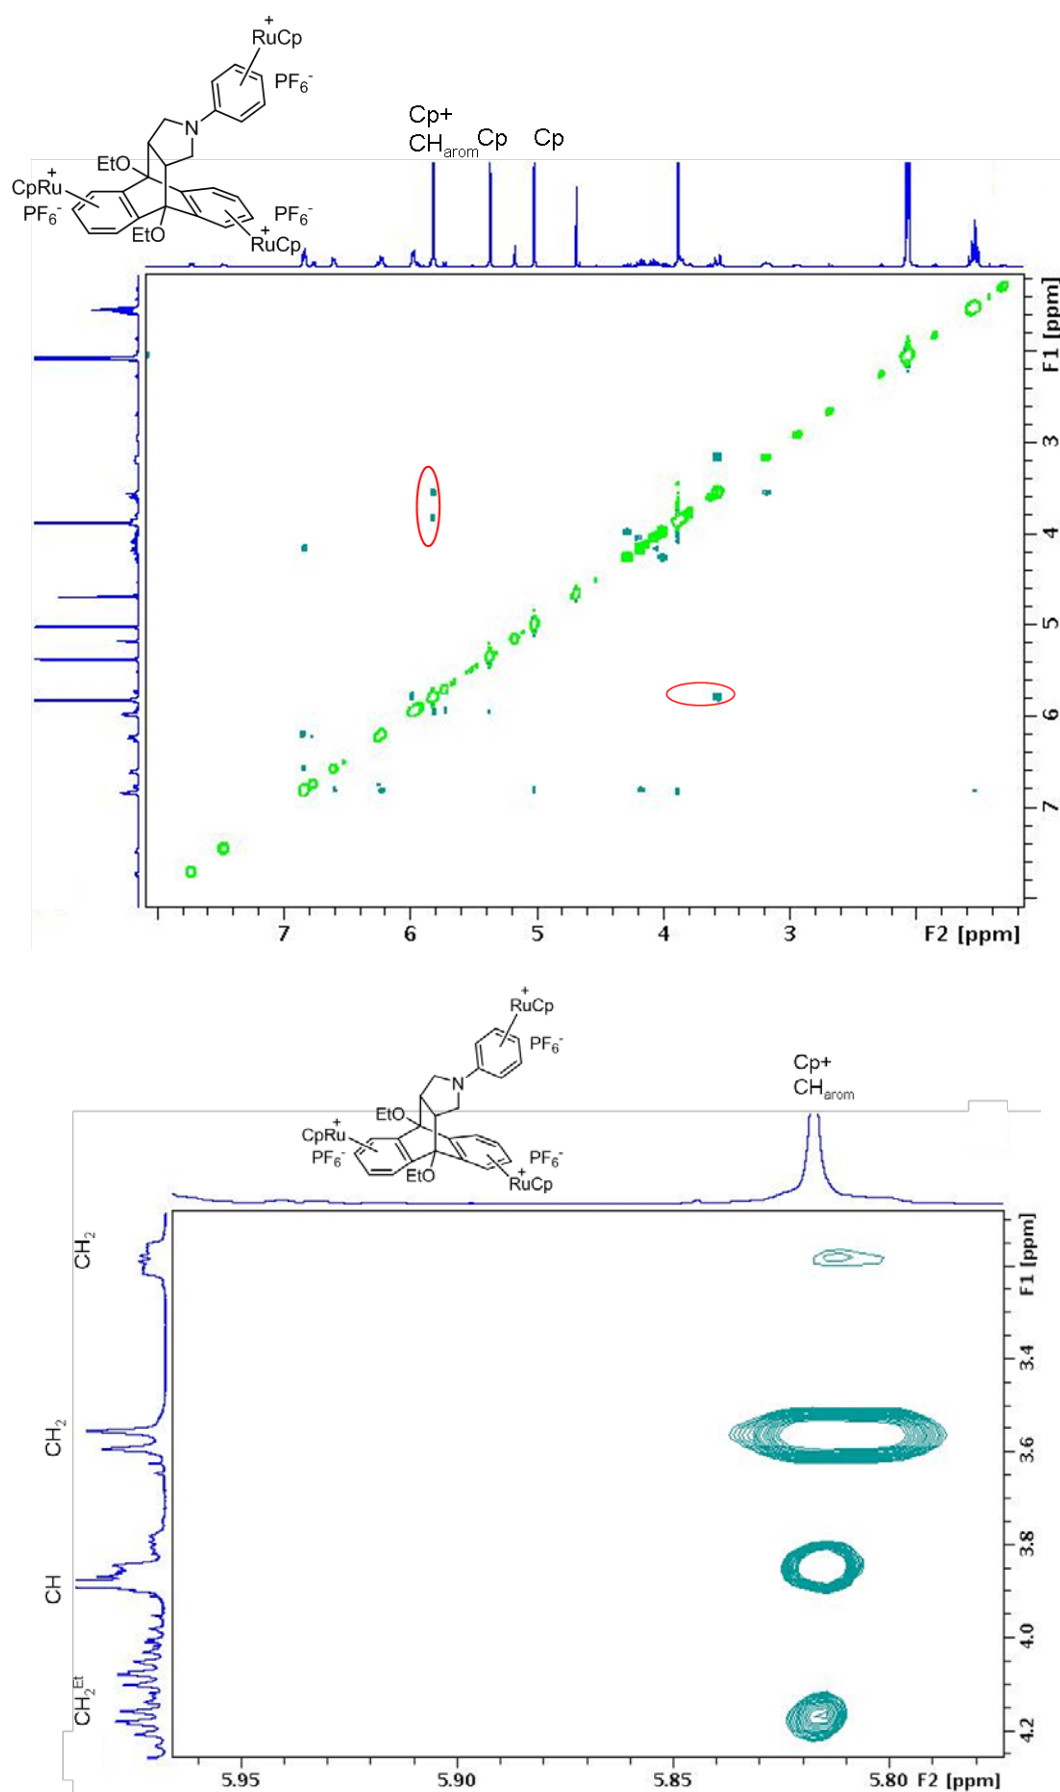

**Fig. S7.** NOESY NMR spectrum (300 MHz,  $(\text{CD}_3)_2\text{CO}$ , 298 K) and selected NOE contacts for **DRu3**.

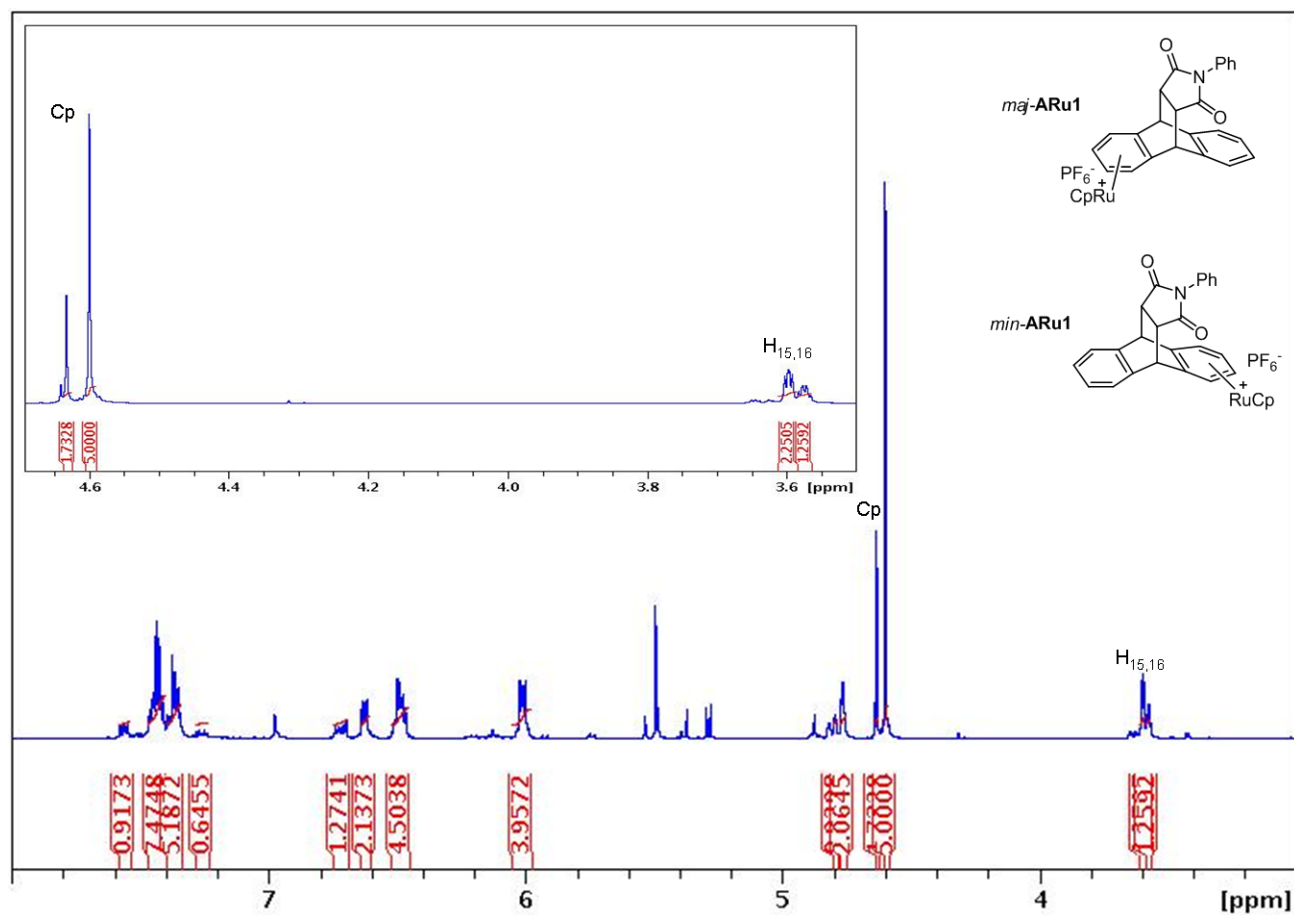

**Fig. S8.**  $^1\text{H}$  NMR (300 MHz,  $\text{CD}_3\text{CN}$ , 298 K) spectrum for **ARu1**.



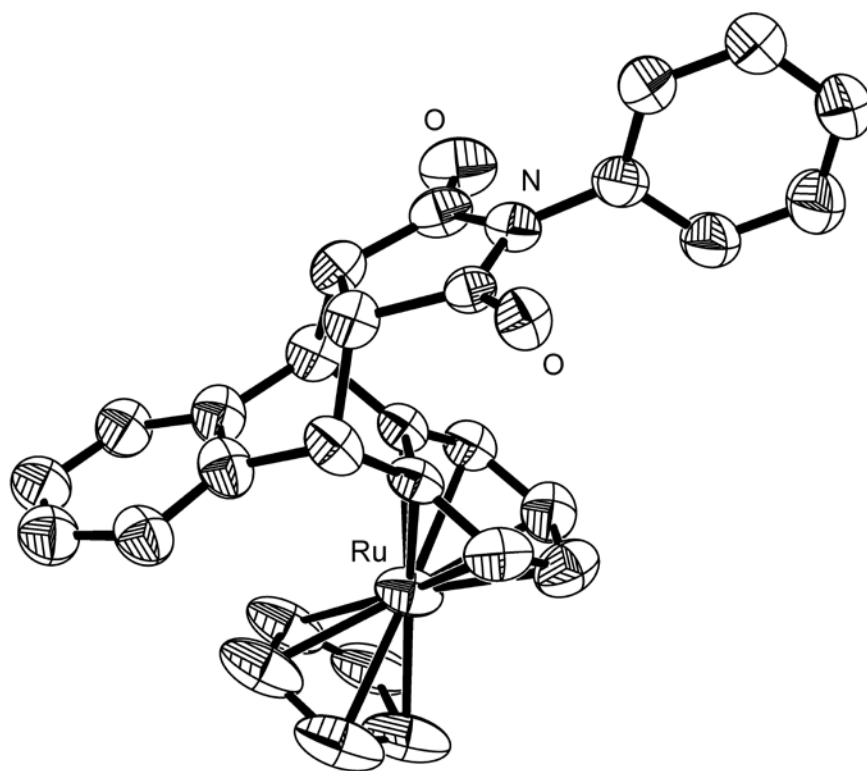

**Fig. S9.** Molecular view of the cation corresponding to complex **ARu1** (ellipsoids representing 50% probability). Hydrogen atoms and the hexafluorophosphate anion are omitted for clarity.

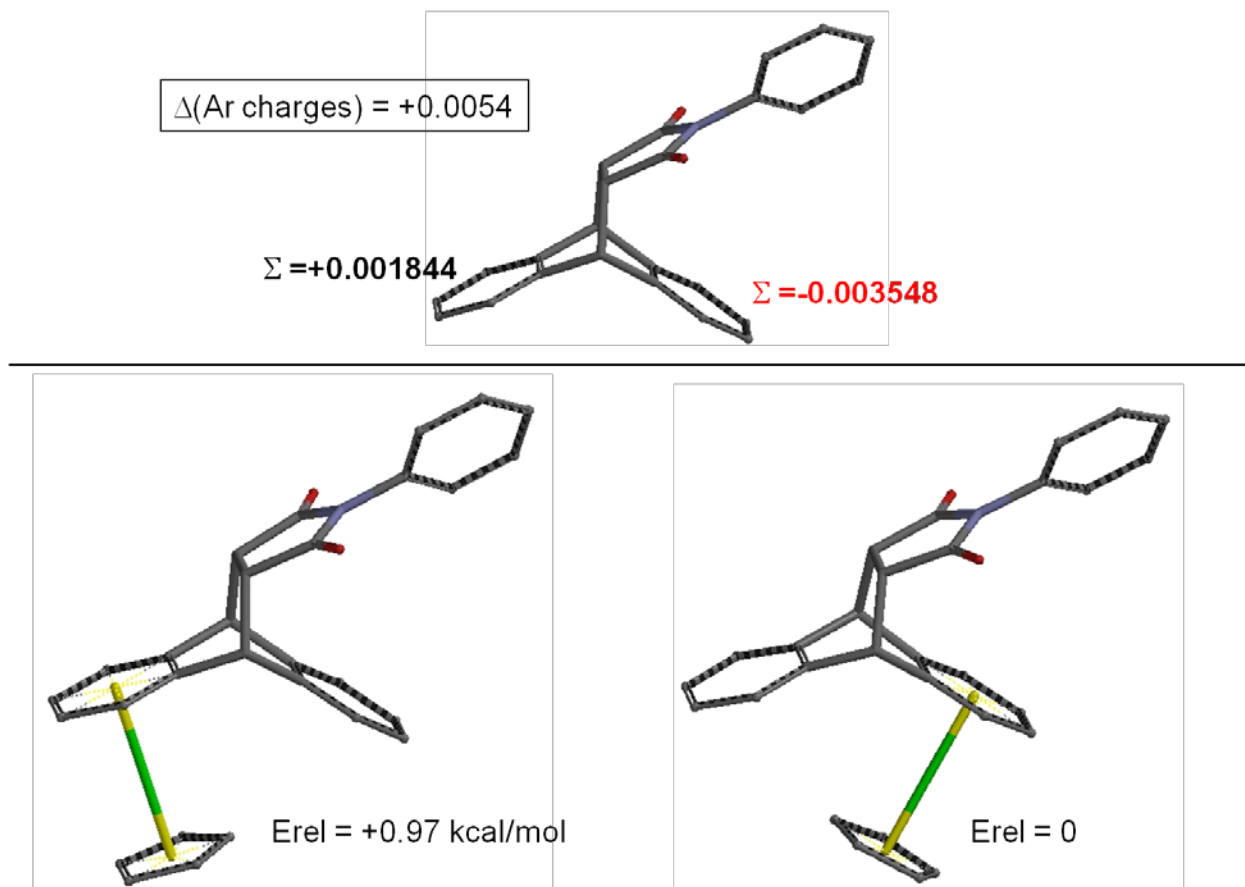

**Fig. S10.** Calculated structures (DFT) for cations  $[\text{RuCp}((\eta^6\text{-arene})\mathbf{A})]^+$  showing the coordination through  $\text{Ar1}$  (bottom, left) and  $\text{Ar2}$  (bottom, right). Hydrogen atoms are omitted for clarity. NAP charges calculated for ligand  $\mathbf{A}$  for both aromatic cycles,  $\text{Ar1}$  and  $\text{Ar2}$ . Energy values relative to the most stable isomer.

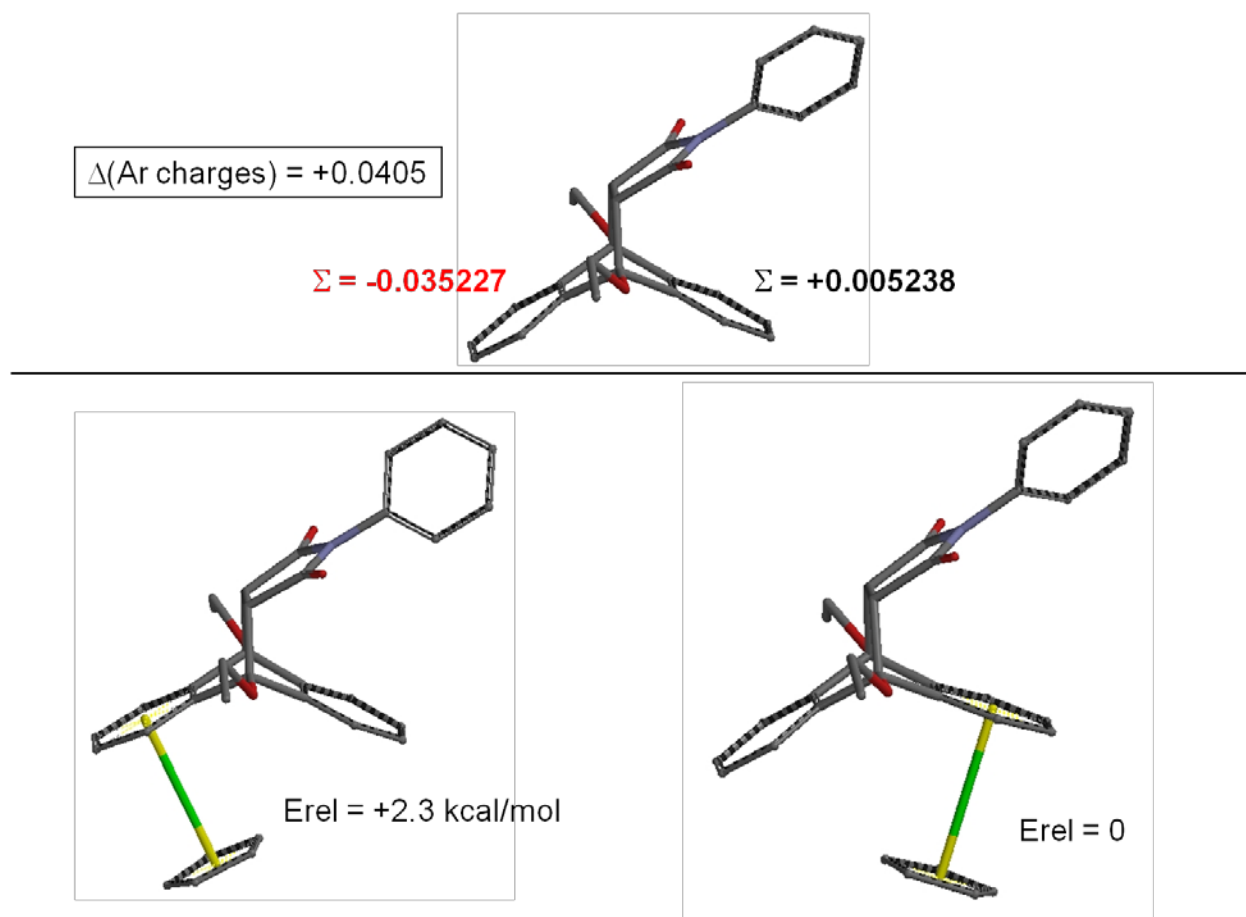

**Fig. S11.** Calculated structures (DFT) for cations  $[\text{RuCp}((\eta^6\text{-arene})\mathbf{B})]^+$  showing the coordination through **Ar1** (bottom, left) and **Ar2** (bottom, right). Hydrogen atoms are omitted for clarity. NAP charges calculated for ligand **B** for both aromatic cycles, **Ar1** and **Ar2**. Energy values relative to the most stable isomer.
